# Supplementary material
Source: PubMed Central journal article supplement (PMC6209122)
Supplement: NIHMS1505987-supplement-Supplemental_Figures.pdf [file NIHMS1505987-supplement-Supplemental_Figures.pdf]

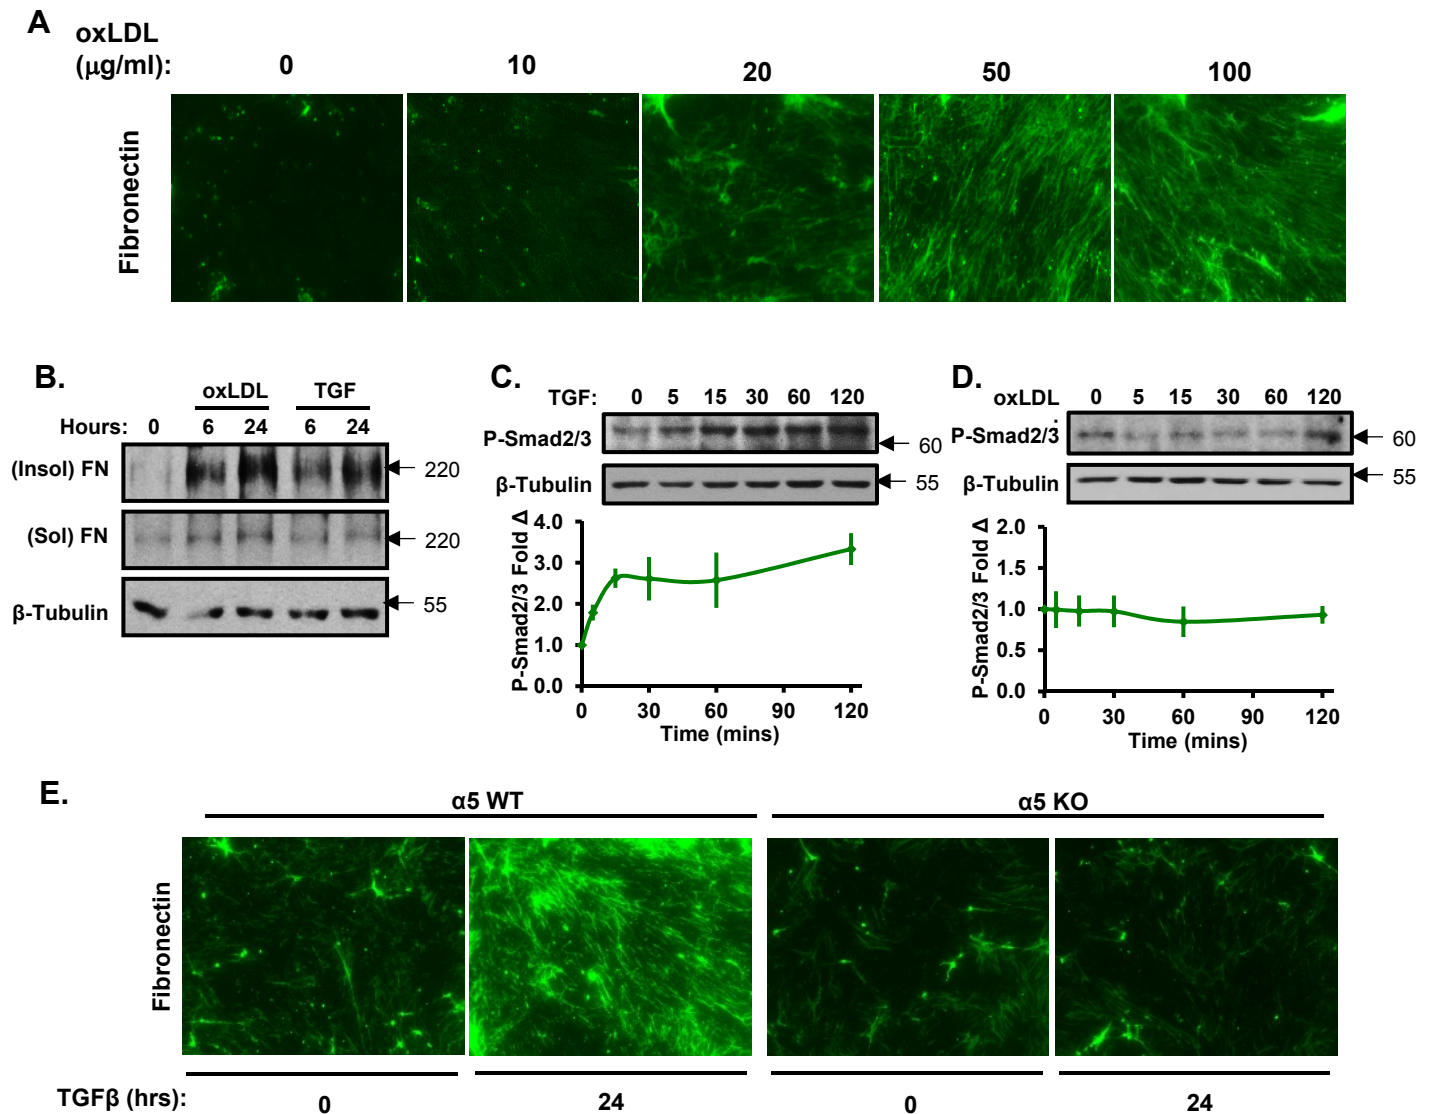

**Supplementary Figure I.** A) Dose curve of fibronectin deposition in response to oxLDL.  $n=3$ . B) HAECs were treated with oxLDL (100  $\mu\text{g/ml}$ ) or TGF $\beta$  (10  $\text{ng/ml}$ ) for the indicated times. Cells were lysed in DOC-containing buffer, followed by blotting for fibronectin. Representative Western blots are shown ( $n=3$ ). C/D) HAECs were treated with either TGF $\beta$  (B) or oxLDL (C) for the indicated times, followed by analysis of Smad2/3 activity. Representative Western blots are shown ( $n=3$ ). E)  $\alpha 5$  WT and KO MAECs were treated with TGF $\beta$  (10  $\text{ng/ml}$ ) for 24 hours, followed by fibronectin extraction. Immunocytochemistry was performed to visualize fibronectin.  $n=3$ .

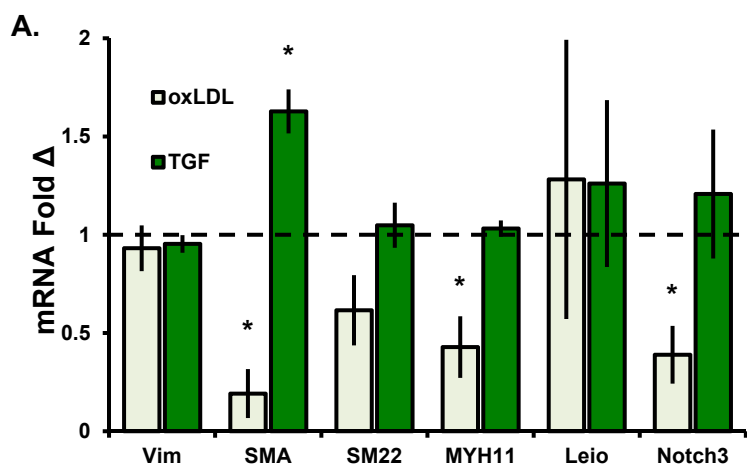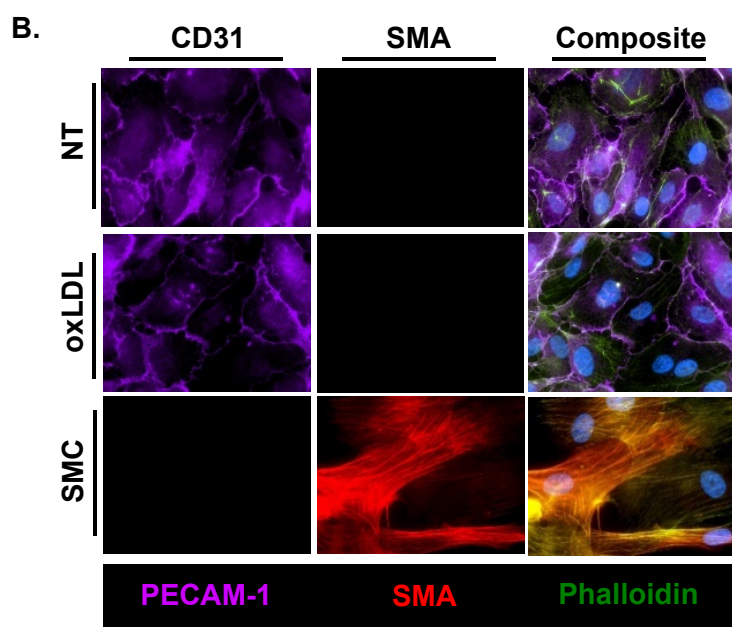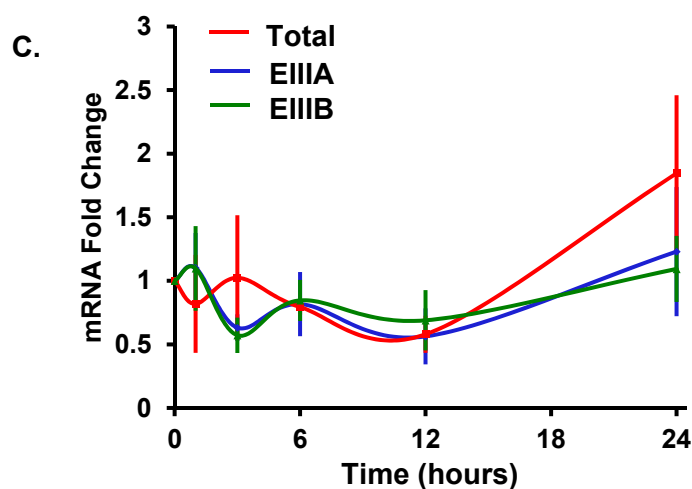

**Supplementary Figure II.** A) HAECs were treated with oxLDL or TGF $\beta$  for 3 hrs, followed by mRNA analysis using quantitative real-time polymerase chain reaction for several EndMT markers including Vim, SM22, MYH11, Leio, and Notch3.  $n=3$ . B) HAECs were treated with oxLDL, followed by fixation and immunostaining for SMA, CD31 (endothelial marker), and phalloidin. Representative images are shown ( $n=3$ ). C) HAECs were plated on BM and treated with oxLDL for the indicated times, followed by mRNA analysis for fibronectin.  $n=3$ . Values are means $\pm$ SE. \* $P<0.05$  compared with no treatment condition.

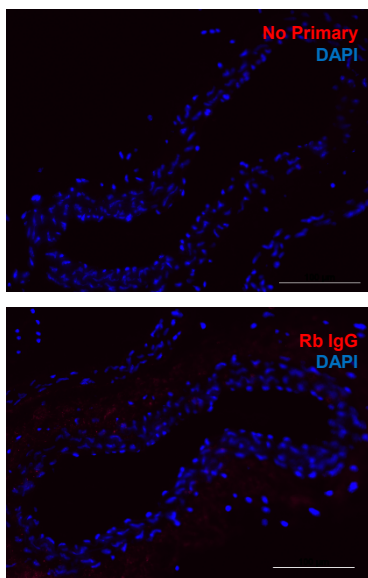

**Supplementary Figure III.**

Representative images of non-immune immunoglobulin controls using either secondary antibody only or rabbit IgG and secondary antibody.

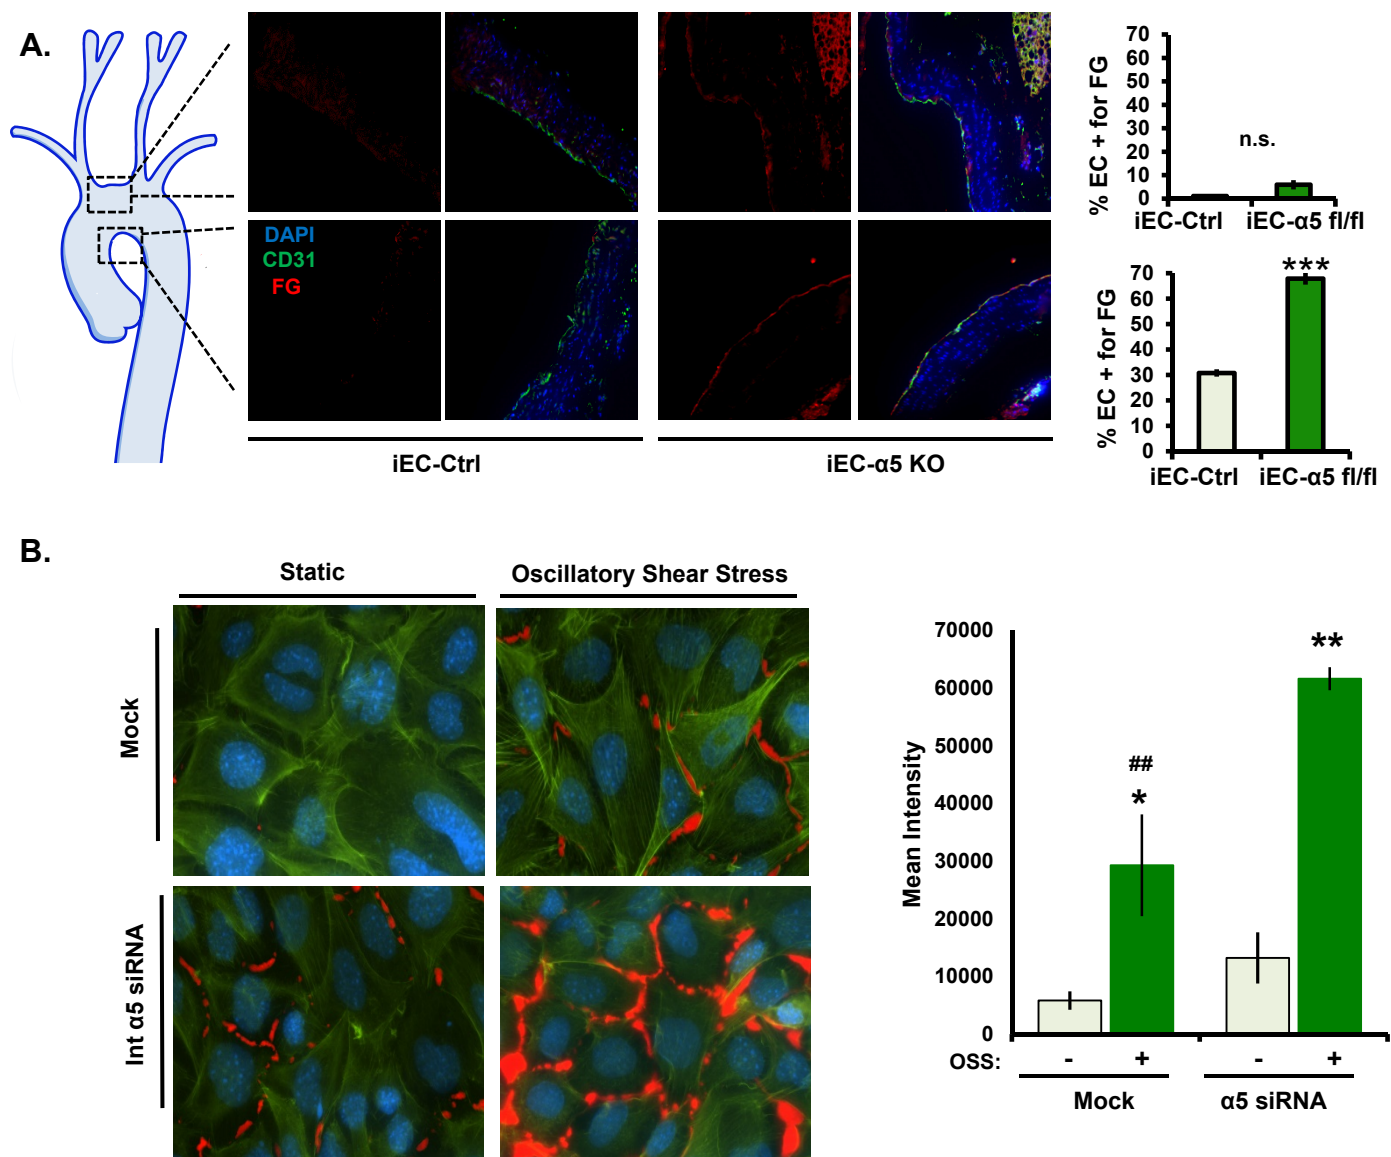

**Supplementary Figure IV.** A) Sections of aortic arch from iEC-Ctrl and iEC- $\alpha 5$  KO mice were stained for the leak of plasma protein fibrinogen into the vessel wall. Representative images are shown (n=5). B) HAECs were transfected with  $\alpha 5$  siRNA and plated on biotinylated gelatin coated slides overnight, followed by exposure to oscillatory shear stress for 18 hours. Subsequently, streptavidin-Alexa647 was added to the cells to visualize permeable areas, and cells were immunostained with Alexa488-phalloidin to visualize cell structure. Representative images are shown (n=4). Values are means $\pm$ SE. \*P<0.05, \*\*P<0.01, \*\*\*P<0.001 compared with the control. ###P<0.01 compared with  $\alpha 5$  siRNA.

## Supplemental Figure 4

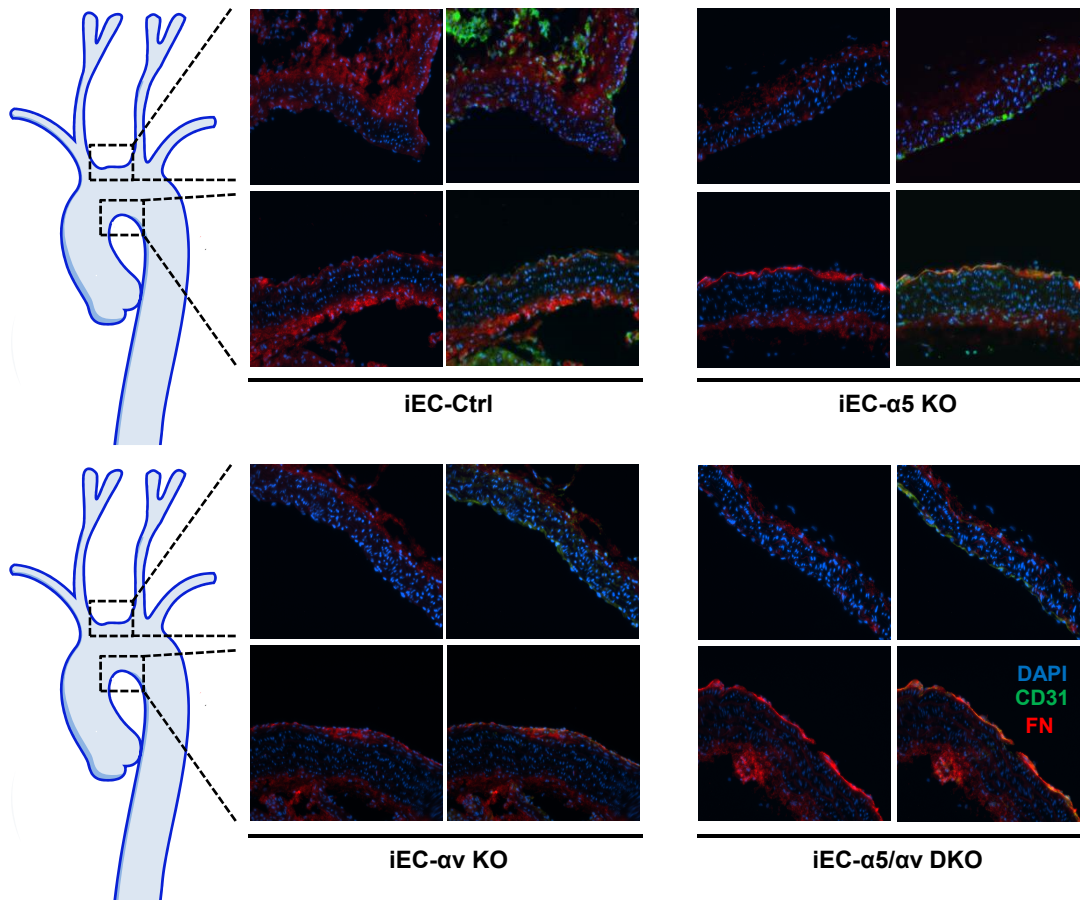

**Supplementary Figure V.** Representative images of fibronectin staining of aortic arch sections from iEC-Ctrl and iEC- $\alpha 5$  KO, iEC- $\alpha v$  KO, and iEC- $\alpha 5/\alpha v$  double knockout DKO mice. n=5-6 of each group.

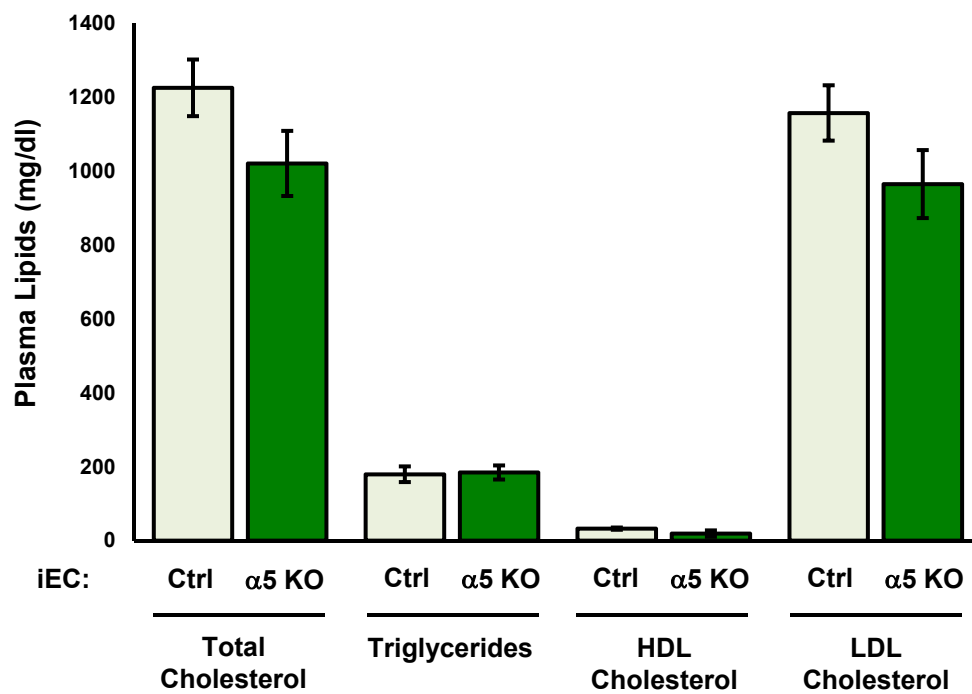

**Supplementary Figure VI.** Plasma from iEC-Control and iEC- $\alpha 5$  KO mice were analyzed for total cholesterol, triglycerides, HDL cholesterol, and LDL cholesterol. No significant differences were identified.

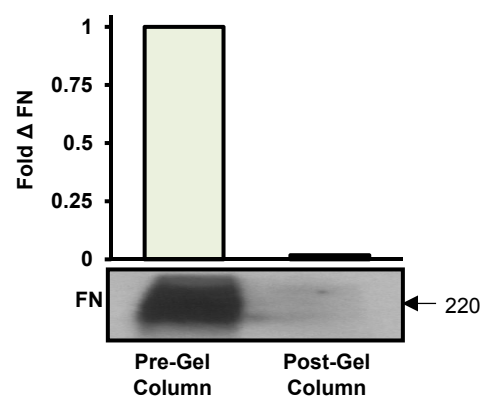

**Supplementary Figure VII.**

Western blot for fibronectin in FBS before and after passage through a gelatin sepharose column to deplete fibronectin.

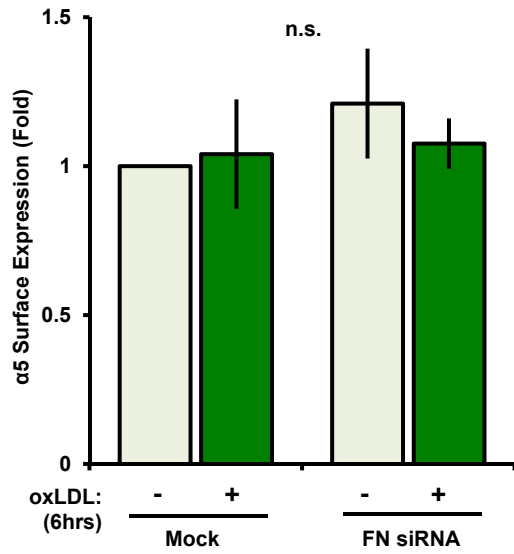

**Supplementary Figure VIII.** HAECs were transfected with FN siRNA and treated with oxLDL for 6 hrs. Surface expression of  $\alpha 5$  was analyzed using FACS.
