# Supplementary material
Source: PubMed Central journal article supplement (PMC6209122)

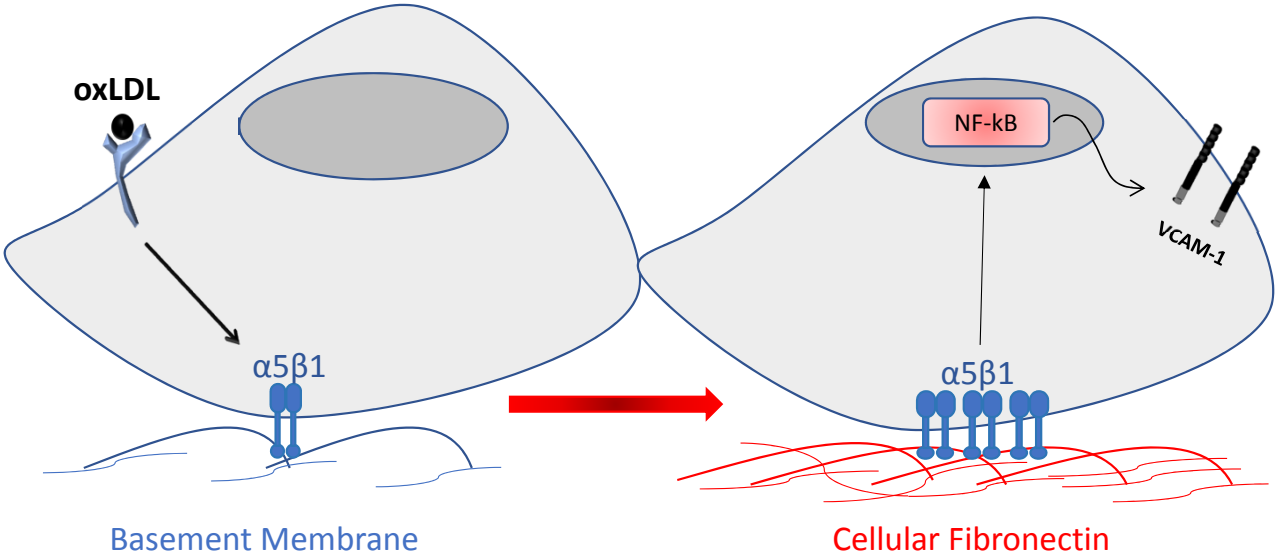

Supplement: NIHMS1505987-supplement-Graphic_Abstract.pdf [file NIHMS1505987-supplement-Graphic_Abstract.pdf]
